# Supplementary material
Source: Research Square preprint supplement (doi:10.21203/rs.3.rs-8652640/v1)
Supplement: Supplementary file 1 [file 765f3354f871e11fcc272c10.docx]

*Table S1:* Antibodies and fluorescent dyes used in this work

| Antibody/Dye target | Species | Dilution | | Company (Catalog #) |
| --- | --- | --- | --- | --- |
| IF | WB |
| Anti-Map2 | Rabbit | 1:200 | 1:1000 | Abcam (ab32454) |
| Anti-Synaptophysin | Rabbit | 1:200 | 1:1000 | Santa Cruz Biotechnology  (sc-17750) |
| Anti-Alpha-synuclein (phospho S129) | Rabbit | 1/200 | 1:1000 | Abcam (ab51253) |
| Anti-alpha Synuclein (Syn 211) | Mouse | 1200 | 1:1000 | Invitrogen (32-8100) |
| Anti-PSD95 | Mouse | - | 1:1000 | Abcam (ab18258) |
| Anti-Biotin | Mouse | - | 1:1000 | ThermoFisher (4967S) |
| Anti-β-Actin | Mouse | - | 1:2000 | Cell Signaling (4967) |
| DAPI | - | 1/5000 |  | Invitrogen(D1306) |
| Alexa Fluor 488-phalloidin | - | 1:500 | - | ThermoFisher (A12379) |
| Fluo-4-AM cell permanent | - | 10μM |  | ThermoFisher F14201 (2836715) |
| Anti-HA | Mouse | 1/200 | 1:1000 | Thermo-Fisher (26183) |
| Lysotracker Deep red | - | 1μM |  | Thermo-Fisher (L12492) |
| Anti-rabbit IgG, HRP-linked Antibody | Rabbit | - | 1:2000 | Cell Signaling (7074**)** |
| Alexa Flour 488 | Mouse | 1:200 | - | Invitrogen (A32766) |
| Alexa Flour 647 | Rabbit | 1:200 | - | Invitrogen (A-32733) |
| IRDye 680DR | Rabbit |  | 1:10000 | LI-COR (926-68073) |
| IRDye 800CW | Mouse |  | 1:10000 | LI-COR (926-32212) |
|  |  |  |  |  |

**Specific reagents:**

Sodium 2-mercaptoethanesulfonate (MESNA) was purchased from Millipore Sigma (USA). Chitin resin was purchased from New England Biolabs (USA). Rink amide resin, Fmoc amino acids, and HATU were purchased from P3 BioSystems (USA). Solvents (DMF, DCM, DIEA, TFA) were purchased from Sigma-Aldrich (USA). IPTG, Dithiothreitol and ProBlock™ Protease Inhibitor Cocktail tablets were purchased from GoldBio (USA). Thalidomide (BP-24453) and AHPC (BP-25120) NHS esters, Sulfo-DBCO-amine (BP-23309) and Biotin-NHS ester (BP-22106) were purchased from BroadPharm (California, USA). TAMRA carboxylic acid, 5-isoform (67190) was purchased from Lumiprobe (USA).
